# Supplementary material for: Regulating the microscopic structure of solutions to synthesize centimeter-sized low-dimensional CsmSbnClm+3n perovskite single crystals for visible-blind ultraviolet photodetectors
Source: Royal Society of Chemistry journal article supplement (doi:10.1039/d3qi02153j), 2023-11-27
Supplement: d3qi02153j1.pdf [file d3qi02153j1.pdf]

Electronic Supplementary Material (ESI) for Inorganic Chemistry Frontiers.

**Regulating the microscopic structure of solutions to synthesize  
centimeter-sized low-dimensional  $\text{Cs}_m\text{Sb}_n\text{Cl}_{m+3n}$  perovskite single  
crystals for visible-blind ultraviolet photodetectors**

*Wenzhen Wang,<sup>a,b,d</sup> Shanhu Xu,<sup>a</sup> Ziyi Lai,<sup>a</sup> Xiaoxi Feng,<sup>a</sup> Huanzhen Qi,<sup>a</sup> Qiutao Pan,<sup>a</sup> Zichen Yang,<sup>c</sup> Jiaxing Kang,<sup>c</sup> Yue Li,<sup>c</sup> Xin Shu,<sup>c</sup> Zifa Zhang,<sup>c</sup> Yan Zhu,<sup>d</sup> Jiaxin Bai,<sup>e</sup> Feng Hong,<sup>c</sup> Juan Qin,<sup>b</sup> Run Xu,<sup>\*a,b</sup> Ying He,<sup>c</sup> Fei Xu<sup>c</sup> and Linjun Wang<sup>a,b,c</sup>*

<sup>a</sup> School of Materials Science and Engineering, Shanghai University, 333 Nanchen Road, Shanghai 200444, China.

<sup>b</sup> Zhejiang Institute of Advanced Materials, SHU, 2189 Jiashan Street, Jiashan 314113, China.

<sup>c</sup> Department of Physics, College of Sciences, Shanghai University, 99 Shangda Road, Shanghai 200444, China.

<sup>d</sup> Shanghai Technical Institute of Electronics & Information, 3098 Wahong Road, Shanghai 201411, China.

<sup>e</sup> Hebei Institute of Pure Iron Materials and Application Industry Technology, Handan 056300, China.

\* Corresponding Author. Email: runxu@shu.edu.cn

**Table S1.** Solubilities of CsCl, SbCl<sub>3</sub>, CsCl and SbCl<sub>3</sub> mixed powders, and ground powder from as-grown Cs<sub>3</sub>Sb<sub>2</sub>Cl<sub>9</sub> single crystals in different solvents at 60 °C.

| Solvent                                | CsCl             | SbCl <sub>3</sub>   | CsCl+SbCl <sub>3</sub> | Cs <sub>3</sub> Sb <sub>2</sub> Cl <sub>9</sub> |
|----------------------------------------|------------------|---------------------|------------------------|-------------------------------------------------|
| DI Water                               | Highly Soluble   | Hydrolysis Reaction | Insoluble              | Insoluble                                       |
| Hydrochloric Acid (37 wt.%)            | Highly Soluble   | Soluble             | Slightly Soluble       | Slightly Soluble                                |
| Hydrochloric Acid (8 wt.%)             | Highly Soluble   | Highly Soluble      | Soluble                | Soluble                                         |
| Ethyl Alcohol                          | Slightly soluble | Highly Soluble      | Insoluble              | Insoluble                                       |
| Isopropanol                            | Slightly soluble | Soluble             | Insoluble              | Insoluble                                       |
| DMSO                                   | Slightly soluble | Highly Soluble      | Slightly Soluble       | Slightly Soluble                                |
| NMP                                    | Slightly soluble | Highly Soluble      | Slightly Soluble       | Insoluble                                       |
| DMF                                    | Insoluble        | Soluble             | Insoluble              | Insoluble                                       |
| GBL                                    | Insoluble        | Soluble             | Insoluble              | Insoluble                                       |
| DMSO+DMF                               | Slightly soluble | Highly Soluble      | Slightly Soluble       | Slightly Soluble                                |
| DMSO+NMP                               | Slightly soluble | Highly Soluble      | Slightly Soluble       | Slightly Soluble                                |
| DMSO+GBL                               | Slightly soluble | Highly Soluble      | Slightly Soluble       | Slightly Soluble                                |
| DMSO+<br>Hydrochloric<br>Acid (8 wt.%) | Soluble          | Highly Soluble      | Highly Soluble         | Highly Soluble                                  |

**Notes:** Highly Soluble: > 10 g/100 g (solvent); Soluble: 1 g/100 g (solvent) ~ 10 g/100 g (solvent); Slightly soluble: 0.01 g/100 g (solvent) ~ 1 g/100 g (solvent); Insoluble: < 0.01 g/100 g (solvent).

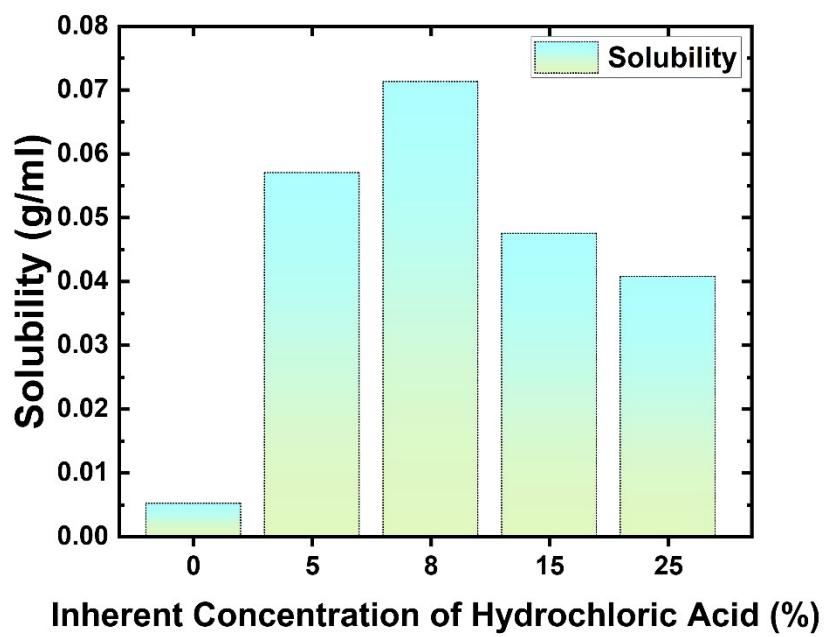

**Figure S1.** Solubilities of CsCl and SbCl<sub>3</sub> mixed powders in the hybrid solvent of DMSO and the dilute hydrochloric acid in different concentrations with the fixed volume ratio of 4:1.

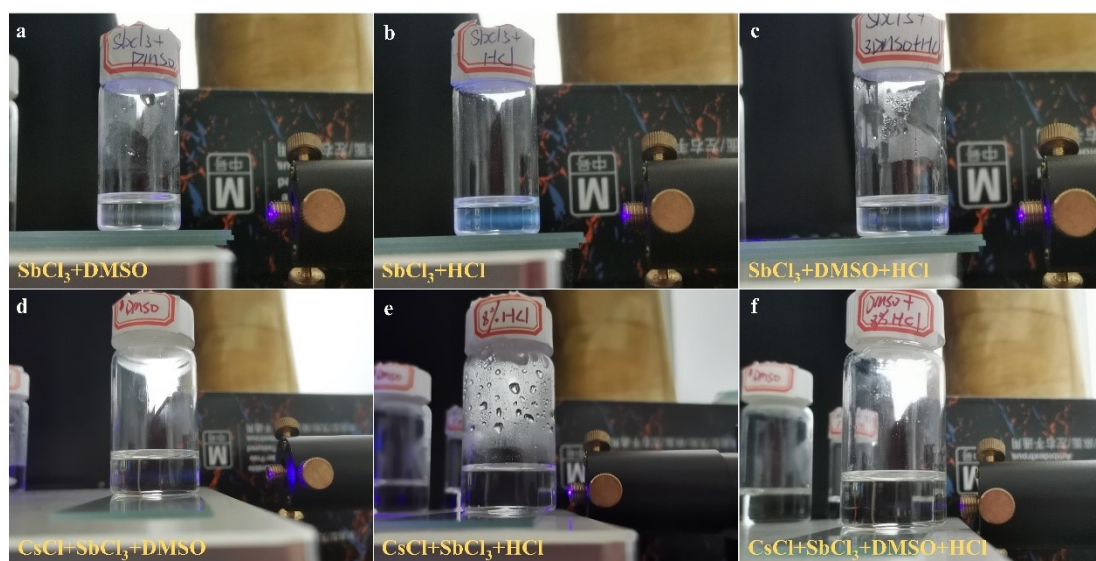

**Figure S2.** The typical Tyndall effect of the colloidal solution.

**Table S2.** Atomic parameters of trigonal  $\alpha$ -Cs<sub>3</sub>Sb<sub>2</sub>Cl<sub>9</sub> obtained from the Rietveld refinement of PXRD data.

|                  | x/a        | y/b     | z/c     | U(eq)     | Wyck. |
|------------------|------------|---------|---------|-----------|-------|
| Cs1              | 0.33333    | 0.66667 | 0.32567 | 0.000     | 2d    |
| Cs2              | 0.00000    | 0.00000 | 0.00000 | 0.000     | 1a    |
| Sb               | 0.33333    | 0.66667 | 0.82006 | 0.000     | 2d    |
| Cl1              | 0.53012    | 0.53012 | 0.00000 | 0.000     | 3e    |
| Cl2              | 0.35597    | 0.20333 | 0.32530 | 0.000     | 6g    |
| Bond lengths (Å) | Sb–Cl1     |         |         | 2.8470(0) |       |
|                  | Sb–Cl2     |         |         | 2.5280(0) |       |
|                  | Cl1–Sb–Cl1 |         |         | 87.1780   |       |
| Bond angles (°)  | Cl2–Sb–Cl2 |         |         | 92.6074   |       |
|                  | Cl1–Sb–Cl2 |         |         | 90.3757   |       |
| a (Å)            |            |         | 7.8093  |           |       |
| c (Å)            |            |         | 9.5738  |           |       |
| $\alpha$ (°)     |            |         | 90      |           |       |
| $\gamma$ (°)     |            |         | 120     |           |       |

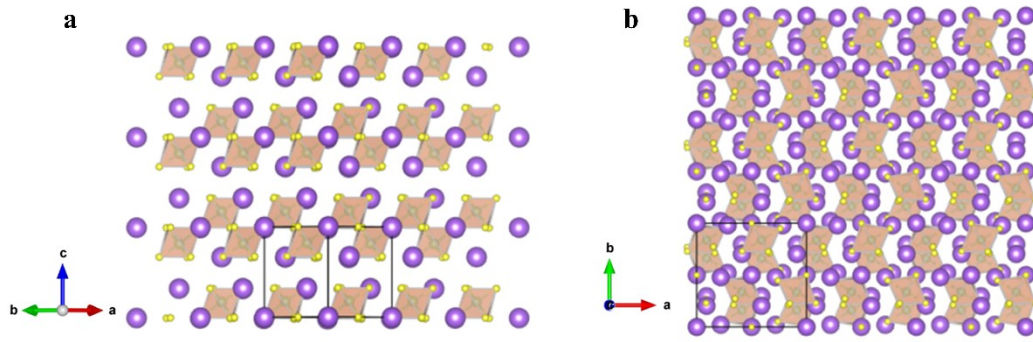

Figure S3. Schematic illustration of the crystal structures of CSC. a) 2D  $\alpha\text{-Cs}_3\text{Sb}_2\text{Cl}_9$ , b) 0D  $\text{Cs}_5\text{Sb}_2\text{Cl}_{11}$ .

**Table S3.** Positional parameters of Cs<sub>5</sub>Sb<sub>2</sub>Cl<sub>11</sub> obtained from the Rietveld refinement of XRD data.

|     | <b>x/a</b> | <b>y/b</b> | <b>z/c</b> | <b>U(eq)</b> |
|-----|------------|------------|------------|--------------|
| Cs1 | 0.58913(2) | 0.29623(2) | 0.35755(2) | 0.02030(7)   |
| Cs2 | 0.71850(2) | 0.02074(2) | 0.14475(2) | 0.02073(7)   |
| Cs3 | 0.5        | 0.5        | 0.0        | 0.01673(7)   |
| Sb1 | 0.59006(2) | 0.66240(2) | 0.38202(2) | 0.01097(6)   |
| Cl1 | 0.5        | 0.5        | 0.5        | 0.01822(18)  |
| Cl2 | 0.76046(5) | 0.55251(5) | 0.39049(5) | 0.02110(14)  |
| Cl3 | 0.65128(5) | 0.77309(5) | 0.52129(5) | 0.02301(14)  |
| Cl4 | 0.66432(5) | 0.78799(6) | 0.26887(5) | 0.02351(14)  |
| Cl5 | 0.41422(4) | 0.76951(5) | 0.38693(5) | 0.01893(13)  |
| Cl6 | 0.52496(5) | 0.54427(5) | 0.23593(4) | 0.01913(13)  |

**Table S4.** Bond lengths of Cs<sub>5</sub>Sb<sub>2</sub>Cl<sub>11</sub> obtained from the Rietveld refinement of XRD data.

| <b>Bond</b> | <b>Bond lengths (Å)</b> |
|-------------|-------------------------|
| Sb1-Cl1     | 2.8920(17)              |
| Sb1-Cl2     | 2.6277(6)               |
| Sb1-Cl3     | 2.5629(7)               |
| Sb1-Cl4     | 2.4592(7)               |
| Sb1-Cl5     | 2.6698(6)               |
| Sb1-Cl6     | 2.7057(6)               |



**Table S5.** Bond angles of Cs<sub>5</sub>Sb<sub>2</sub>Cl<sub>11</sub> obtained from the Rietveld refinement of XRD data.

| <b>Bond</b>     | <b>Bond angles (°)</b> |
|-----------------|------------------------|
| Cl4-Sb1-Cl3     | 93.12(2)               |
| Cl3-Sb1-Cl2     | 88.51(2)               |
| Cl3-Sb1-Cl5     | 89.11(2)               |
| Cl4-Sb1-Cl6     | 87.33(2)               |
| Cl2-Sb1-Cl6     | 91.42(2)               |
| Cl4-Sb1-Cl11    | 174.327(19)            |
| Cl2-Sb1-Cl11    | 87.718(16)             |
| Cl6-Sb1-Cl11    | 87.125(15)             |
| Cl4-Sb1-Cl2     | 91.21(2)               |
| Cl4-Sb1-Cl5     | 92.63(2)               |
| Cl2-Sb1-Cl5     | 175.58(2)              |
| Cl3-Sb1-Cl6     | 179.54(2)              |
| Cl5-Sb1-Cl6     | 90.94(2)               |
| Cl3-Sb1-Cl11    | 92.419(17)             |
| Cl5-Sb1-Cl11    | 88.667(15)             |
| Sb1-Cl11-Sb1#10 | 180.0                  |

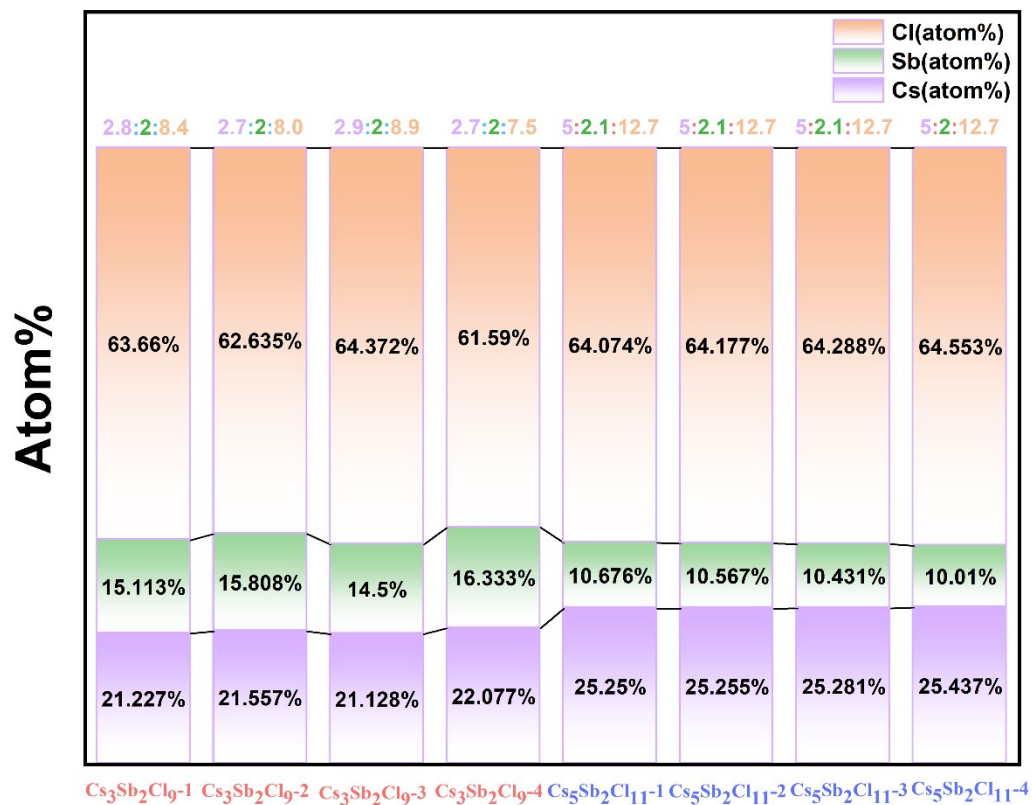

Figure S4. Summary of X-ray fluorescence results for multiple CSC single crystal samples.

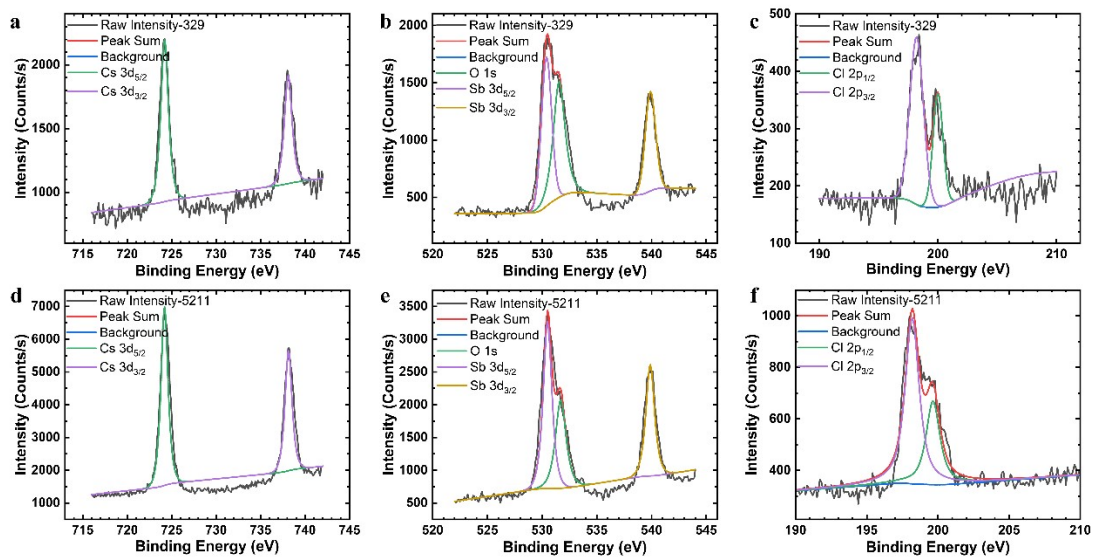

Figure S5. X-ray photoelectron spectroscopy spectra of CSC single crystals. a, d) Cs 3d. b, e) Sb 3d. c, f) Cl 2p. a, b, and c) Cs<sub>3</sub>Sb<sub>2</sub>Cl<sub>9</sub>. d, e, and f) Cs<sub>5</sub>Sb<sub>2</sub>Cl<sub>11</sub>.

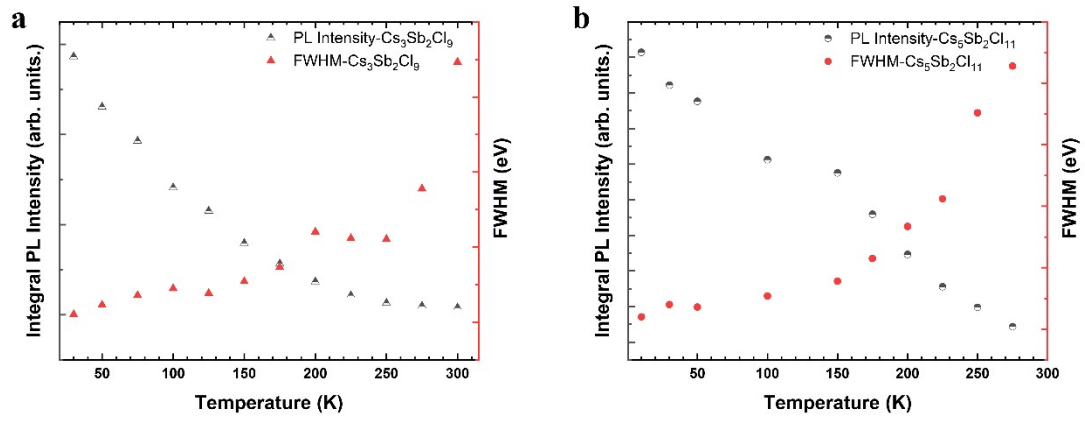

**Figure S6.** PL intensity and FWHM of CSC crystals as a function of temperature. a)  $\text{Cs}_3\text{Sb}_2\text{Cl}_9$ , b)  $\text{Cs}_5\text{Sb}_2\text{Cl}_{11}$ .

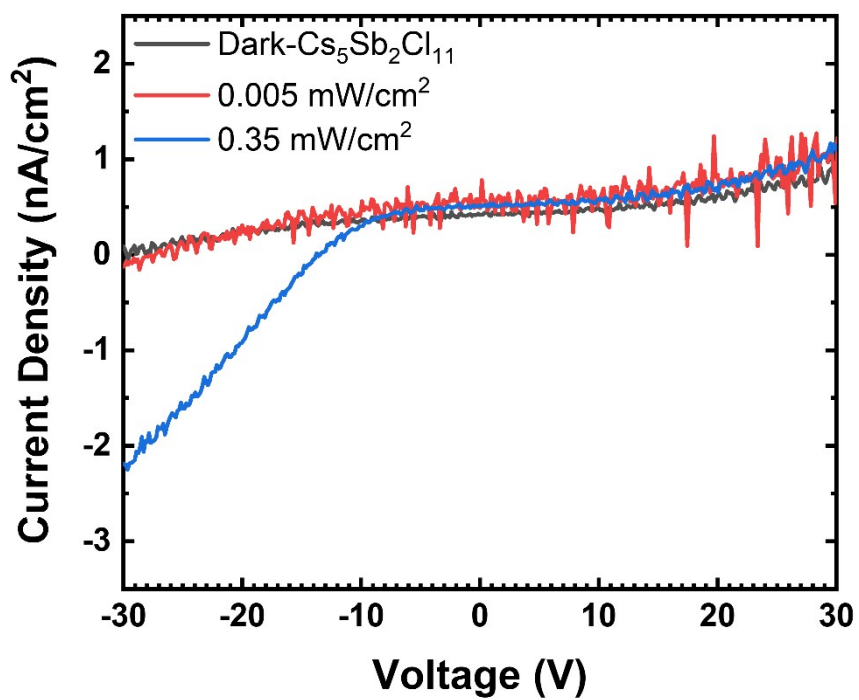

**Figure S7.** I-V curves of the Cs<sub>5</sub>Sb<sub>2</sub>Cl<sub>11</sub> single-crystal photodetector in the dark and under different irradiances at 266 nm for bias voltage in the range from -30 V to 30 V.
